# Supplementary material for: Single Domain Antibody Inhibitors Target the Coiled Coil Arms of the Bacillus subtilis SMC complex
Source: bioRxiv preprint, doi:10.1101/2025.10.16.682983, version 2 (2026-04-27)
Supplement: Table S2 [file 682983_file03.xlsx]

## Sheet: Feuil1
Sybody #	Protein sequence (CDR1, CDR2 and CDR3 are colored in yellow, orange and red, respectively)
002	GSSSQVQLVESGGGLVQAGGSLRLSCAASGFPVE-YTVMTWYRQAPGKEREWVAAIASTGAWAHYADSVKGRFTISRDNAKNTVYLQMNSLKPEDTAVYYCNVKDYGTSYTTYDYWGQGTQVTVSAGRAGEQKLISEEDLNSAVDHHHHHH*
003	GSSSQVQLVESGGGLVQAGGSLRLSCAASGFPVDAAMFMVWYRQAPGKEREWVAAISSNGQHTEYADSVKGRFTISRDNAKNTVYLQMNSLKPEDTAVYYCNVKDWGATIWWYDYWGQGTQVTVSAGRAGEQKLISEEDLNSAVDHHHHHH*
006	GSSSQVQLVESGGGLVQAGGSLRLSCAASGFPVS-YIVMTWYRQAPGKEREWVAAITSNGAGTYYADSVKGRFTISRDNAKNTVYLQMNSLKPEDTAVYYCNVKDFGTHQRSYDYWGQGTQVTVSAGRAGEQKLISEEDLNSAVDHHHHHH*
010	GSSSQVQLVESGGGLVQAGGSLRLSCAASGFPVY-YVVMAWYRQAPGKEREWVAAISSSGTWTHYADSVKGRFTISRDNAKNTVYLQMNSLKPEDTAVYYCNVKDYGGADAAYDYWGQGTQVTVSAGRAGEQKLISEEDLNSAVDHHHHHH*
015	GSSSQVQLVESGGGLVQAGGSLRLSCAASGFPVN-YTVMVWYRQAPGKEREWVAAITSSGRYTHYADSVKGRFTISRDNAKNTVYLQMNSLKPEDTAVYYCNVKDYGSAAANYDYWGQGTQVTVSAGRAGEQKLISEEDLNSAVDHHHHHH*
020	GSSSQVQLVESGGGLVQAGGSLRLSCAASGFPVE-LITMAWYRQAPGKEREWVAAITSTGDITHYADSVKGRFTISRDNAKNTVYLQMNSLKPEDTAVYYCNVKDWGASRYNYDYWGQGTQVTVSAGRAGEQKLISEEDLNSAVDHHHHHH*
021	GSSSQVQLVESGGGLVQAGGSLRLSCAASGFPVEAYIVMAWYRQAPGKEREWVAAIMSNGMETVYADSVKGRFTISRDNAKNTVYLQMNSLKPEDTAVYYCNVKDFGSAHWQYDYWGQGTQVTVSAGRAGEQKLISEEDLNSAVDHHHHHH*
031	GSSSQVQLVESGGGLVQAGGSLRLSCAASGFPVN-EWYMAWYRQAPGKGREWVAAITSRGQYTHYADSVKGRFTISRDNAKNTVYLQMNSLKPEDTAVYYCNVKDWGHQHWWYDYWGQGTQVTVSAGRAGEQKLISEEDLNSAVDHHHHHH*
156	GSSSQVQLVESGGGLVQAGGSLRLSCAASGFPVY-SAYMKWY-QAPGKEREWVAAISSTGYSTEYADSVKGRFTISRDNAKNTVYLQMNSLKPEDTAVYYCNVKDFGAEQWWYDYWGQGTQVTVSAGRAGEQKLISEEDLNSAVDHHHHHH*
160	GSSSQVQLVESGGGLVQAGGSLRLSCAASGFPVA-SIYMAWYRQAPGKEREWVAAISSIGNYTKYADSVKGRFTISRDNAKNTVYLQMNSLKPEDTAVYYCNVKDYGAMQWWYDYWGQGTQVTVSAGRAGEQKLISEEDLNSAVDHHHHHH*
162	GSSSQVQLVESGGGLVQAGGSLRLSCAASGFPVD-ALFMKWYRQAPGKEREWVAAISSNGMITYYADSVKGRFTISRDNAKNTVYLQMNSLKPEDTAVYYCNVKDYGHEEWWYDYWGQGTQVTVSAGRAGEQKLISEEDLNSAVDHHHHHH*
169	GSSSQVQLVESGGGLVQAGGSLRLSCAASGFPVD-QVYMTWYRQAPGKEREWVAAITSSGNHTYYADSVKGRFTISRDNAKNTVYLQMNSLKPEDTAVYYCNVKDYGSSTWWYDYWGQGTQVTVSAGRAGEQKLISEEDLNSAVDHHHHHH*
188	GSSSQVQLVESGGGLVQAGGSLRLSCAASGFPVS-YTVMAWYRQAPGKEREWVAAINSAGYVTHYADSVKGRFTISRDNAKNTVYLQMNSLKPEDTAVYYCNVKDFGQVTRHYDYWGQGTQVTVSAGRAGEQKLISEEDLNSAVDHHHHHH*
194	GSSSQVQLVESGGGLVQAGGSLRLSCAASGFPVY-YISMVWYRQAPGKEREWVAAISSYGNYTHYADSVKGRFTISRDNAKNTVYLQMNSLKPEDTAVYYCNVKDWGSDMHQYDYWGQGTQVTVSAGRAGEQKLISEEDLNSAVDHHHHHH*
Negative controls
007	GSSSQVQLVESGGGLVQAGGSLRLSCAASGFPVY-MITMTWYRQAPGKEREWVAAINSHGYVTHYADSVKGRFTISRDNAKNTVYLQMNSLKPEDTAVYYCNVKDWGAADLAYDYWGQGTQVTVSAGRAGEQKLISEEDLNSAVDHHHHHH*
016	GSSSQVQLVESGGGLVQAGGSLRLSCAASGFPVY-SWSMRWYRQAPGKEREWVAAITSHGESTHYADSVKGRFTISRDNAKNTVYLQMNSLKPEDTAVYYCNVKDHGWGWEAYDYWGQGTQVTVSAGRAGEQKLISEEDLNSAVDHHHHHH*
